# Supplementary material for: Impact of COVID-19 pandemic-induced surgical restrictions on operational performance: a case study at the University Hospital of Ulm
Source: PubMed Central journal article supplement (PMC11599351; doi:10.1007/s00068-024-02558-z), 2024-06-13

# Supplement 1

## A

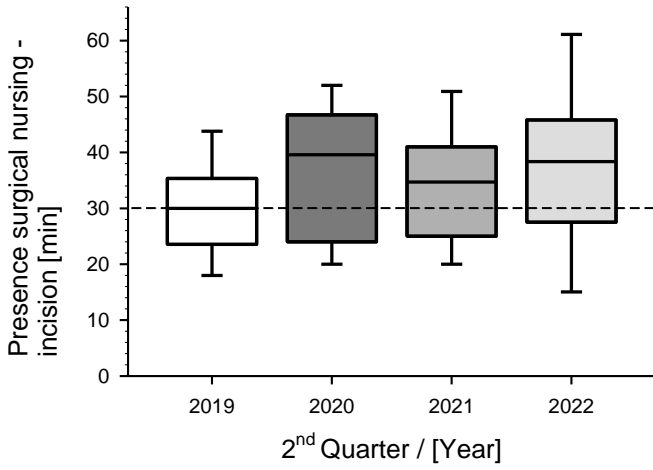

## B

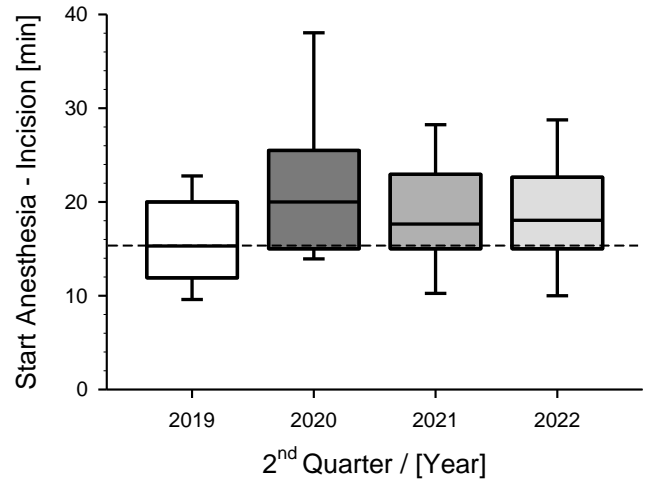

## C

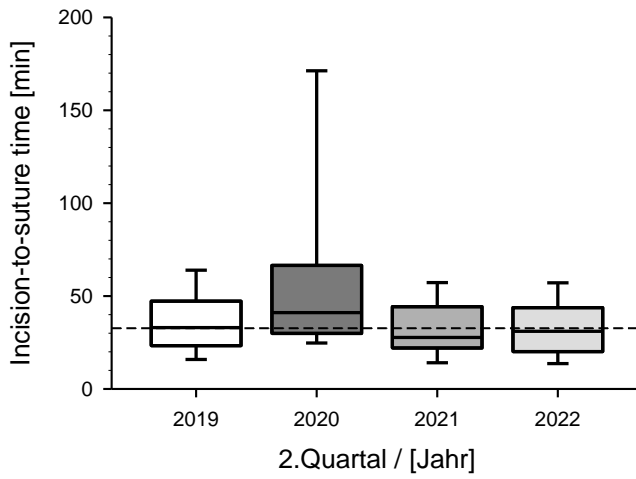

## D

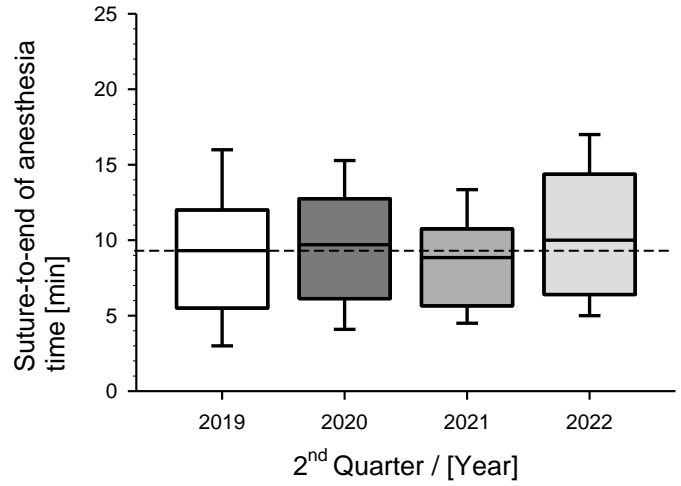

Supplement: 68_2024_2558_MOESM1_ESM.pdf [file 68_2024_2558_MOESM1_ESM.pdf]
